# Supplementary material for: Crystal structure refinement and luminescence properties of Ce3+ singly doped and Ce3+/Mn2+ co-doped KBaY(BO3)2 for n-UV pumped white-light-emitting diodes
Source: Royal Society of Chemistry journal article supplement (doi:10.1039/c3ra42380h), 2013-01-01
Supplement: c3ra42380h.pdf [file c3ra42380h.pdf]

# Supporting Information

Crystal structure refinement and luminescence properties of  
 $\text{Ce}^{3+}$  singly doped and  $\text{Ce}^{3+}/\text{Mn}^{2+}$  co-doped  $\text{KBaY}(\text{BO}_3)_2$  for  
n-UV pumped white-light-emitting diodes

**Zhipeng Lian, Jianfeng Sun, Lijing Zhang, Dezhong Shen,\* Guangqiu Shen,  
Xiaoqing Wang and Qingfeng Yan\***

*Department of Chemistry, Tsinghua University, Beijing 100084, China*

*Tel: +86-10-62772351; E-mail: [shenz@mail.tsinghua.edu.cn](mailto:shenz@mail.tsinghua.edu.cn); [yanqf@mail.tsinghua.edu.cn](mailto:yanqf@mail.tsinghua.edu.cn)*

**Table S1.** The Refined Positions of All Atoms and The Lattice Parameters for A Series of  $\text{KBa}_{0.995-0.5y}\text{Y}_{0.995-0.5y}(\text{BO}_3)_2: 0.01\text{Ce}^{3+}, y\text{Mn}^{2+}$  ( $y=0, 0.01, 0.03, 0.05, \text{ and } 0.07$ )

| <b>Sample</b> $\text{KBa}_{0.995}\text{Y}_{0.995}(\text{BO}_3)_2: 0.01\text{Ce}^{3+}$                   |              |              |              |           |                  |
|---------------------------------------------------------------------------------------------------------|--------------|--------------|--------------|-----------|------------------|
| <b>Atom</b>                                                                                             | x            | y            | z            | Occupancy | $U_{\text{iso}}$ |
| <b>Y</b>                                                                                                | 1.000000(0)  | 0.000000(0)  | 1.000000(0)  | 0.978(0)  | 0.01784          |
| <b>Ba</b>                                                                                               | 1.000000(0)  | 0.000000(0)  | 0.7861470(0) | 0.479(0)  | 0.02389          |
| <b>K</b>                                                                                                | 1.000000(0)  | 0.000000(0)  | 0.7861470(0) | 0.519(0)  | 0.02389          |
| <b>Ce(1)</b>                                                                                            | 1.000000(0)  | 0.000000(0)  | 0.7861470(0) | 0.005(3)  | 0.02389          |
| <b>Ce(2)</b>                                                                                            | 1.000000(0)  | 0.000000(0)  | 1.000000(0)  | 0.005(0)  | 0.01784          |
| <b>B</b>                                                                                                | 0.6667000(0) | 0.3333000(0) | 0.7436000(0) | 1.000(0)  | 0.02769          |
| <b>O</b>                                                                                                | 0.5204000(0) | 0.4796000(0) | 0.7449300(0) | 1.000(0)  | 0.01512          |
| <b>Sample</b> $\text{KBa}_{0.99}\text{Y}_{0.99}(\text{BO}_3)_2: 0.01\text{Ce}^{3+}, 0.01\text{Mn}^{2+}$ |              |              |              |           |                  |
| <b>Atom</b>                                                                                             | x            | y            | z            | Occupancy | $U_{\text{iso}}$ |
| <b>Y</b>                                                                                                | 1.000000(0)  | 0.000000(0)  | 1.000000(0)  | 0.959(0)  | 0.01990          |
| <b>Ba</b>                                                                                               | 1.000000(0)  | 0.000000(0)  | 0.7862240(0) | 0.485(0)  | 0.02651          |
| <b>K</b>                                                                                                | 1.000000(0)  | 0.000000(0)  | 0.7862240(0) | 0.504(0)  | 0.02651          |
| <b>Ce(1)</b>                                                                                            | 1.000000(0)  | 0.000000(0)  | 0.7862240(0) | 0.004(0)  | 0.02651          |
| <b>Ce(2)</b>                                                                                            | 1.000000(0)  | 0.000000(0)  | 1.000000(0)  | 0.005(0)  | 0.01990          |
| <b>Mn(1)</b>                                                                                            | 1.000000(0)  | 0.000000(0)  | 0.7862240(0) | 0.006(0)  | 0.02651          |
| <b>Mn(2)</b>                                                                                            | 1.000000(0)  | 0.000000(0)  | 1.000000(0)  | 0.004(0)  | 0.01990          |
| <b>B</b>                                                                                                | 0.6667000(0) | 0.3333000(0) | 0.7436000(0) | 1.000(0)  | 0.02335          |
| <b>O</b>                                                                                                | 0.5204000(0) | 0.4796000(0) | 0.7449300(0) | 1.000(0)  | 0.02713          |
| <b>Sample</b> $\text{KBa}_{0.98}\text{Y}_{0.98}(\text{BO}_3)_2: 0.01\text{Ce}^{3+}, 0.03\text{Mn}^{2+}$ |              |              |              |           |                  |
| <b>Atom</b>                                                                                             | x            | y            | z            | Occupancy | $U_{\text{iso}}$ |
| <b>Y</b>                                                                                                | 1.000000(0)  | 0.000000(0)  | 1.000000(0)  | 0.964(0)  | 0.01699          |
| <b>Ba</b>                                                                                               | 1.000000(0)  | 0.000000(0)  | 0.7855820(0) | 0.488(0)  | 0.02575          |
| <b>K</b>                                                                                                | 1.000000(0)  | 0.000000(0)  | 0.7855820(0) | 0.515(0)  | 0.02575          |
| <b>Ce(1)</b>                                                                                            | 1.000000(0)  | 0.000000(0)  | 0.7855820(0) | 0.003(0)  | 0.02575          |
| <b>Ce(2)</b>                                                                                            | 1.000000(0)  | 0.000000(0)  | 1.000000(0)  | 0.005(2)  | 0.01699          |
| <b>Mn(1)</b>                                                                                            | 1.000000(0)  | 0.000000(0)  | 0.7855820(0) | 0.016(0)  | 0.02575          |
| <b>Mn(2)</b>                                                                                            | 1.000000(0)  | 0.000000(0)  | 1.000000(0)  | 0.015(0)  | 0.01699          |
| <b>B</b>                                                                                                | 0.6667000(0) | 0.3333000(0) | 0.7436000(0) | 1.000(0)  | 0.00931          |

|               |                                                                                                                 |              |              |                  |                        |
|---------------|-----------------------------------------------------------------------------------------------------------------|--------------|--------------|------------------|------------------------|
| <b>O</b>      | 0.5204000(0)                                                                                                    | 0.4796000(0) | 0.7449300(0) | 1.000(0)         | 0.01460                |
| <hr/>         |                                                                                                                 |              |              |                  |                        |
| <b>Sample</b> | <b>KBa<sub>0.97</sub>Y<sub>0.97</sub>(BO<sub>3</sub>)<sub>2</sub>: 0.01Ce<sup>3+</sup>, 0.05Mn<sup>2+</sup></b> |              |              |                  |                        |
| <b>Atom</b>   | <b>x</b>                                                                                                        | <b>y</b>     | <b>z</b>     | <b>Occupancy</b> | <b>U<sub>iso</sub></b> |
| <b>Y</b>      | 1.0000000(0)                                                                                                    | 0.0000000(0) | 1.0000000(0) | 0.896(0)         | 0.01903                |
| <b>Ba</b>     | 1.0000000(0)                                                                                                    | 0.0000000(0) | 0.7860870(0) | 0.455(0)         | 0.02936                |
| <b>K</b>      | 1.0000000(0)                                                                                                    | 0.0000000(0) | 0.7860870(0) | 0.522(0)         | 0.02936                |
| <b>Ce(1)</b>  | 1.0000000(0)                                                                                                    | 0.0000000(0) | 0.7860870(0) | 0.004(0)         | 0.02936                |
| <b>Ce(2)</b>  | 1.0000000(0)                                                                                                    | 0.0000000(0) | 1.0000000(0) | 0.006(0)         | 0.01903                |
| <b>Mn(1)</b>  | 1.0000000(0)                                                                                                    | 0.0000000(0) | 0.7860870(0) | 0.025(4)         | 0.02936                |
| <b>Mn(2)</b>  | 1.0000000(0)                                                                                                    | 0.0000000(0) | 1.0000000(0) | 0.022(0)         | 0.01903                |
| <b>B</b>      | 0.6667000(0)                                                                                                    | 0.3333000(0) | 0.7436000(0) | 1.000(0)         | 0.03035                |
| <b>O</b>      | 0.5204000(0)                                                                                                    | 0.4796000(0) | 0.7449300(0) | 1.000(0)         | 0.02843                |
| <hr/>         |                                                                                                                 |              |              |                  |                        |
| <b>Sample</b> | <b>KBa<sub>0.96</sub>Y<sub>0.96</sub>(BO<sub>3</sub>)<sub>2</sub>: 0.01Ce<sup>3+</sup>, 0.07Mn<sup>2+</sup></b> |              |              |                  |                        |
| <b>Atom</b>   | <b>x</b>                                                                                                        | <b>y</b>     | <b>z</b>     | <b>Occupancy</b> | <b>U<sub>iso</sub></b> |
| <b>Y</b>      | 1.0000000(0)                                                                                                    | 0.0000000(0) | 1.0000000(0) | 0.953(0)         | 0.01611                |
| <b>Ba</b>     | 1.0000000(0)                                                                                                    | 0.0000000(0) | 0.7850790(0) | 0.508(0)         | 0.02927                |
| <b>K</b>      | 1.0000000(0)                                                                                                    | 0.0000000(0) | 0.7850790(0) | 0.505(0)         | 0.02927                |
| <b>Ce(1)</b>  | 1.0000000(0)                                                                                                    | 0.0000000(0) | 0.7850790(0) | 0.003(0)         | 0.02927                |
| <b>Ce(2)</b>  | 1.0000000(0)                                                                                                    | 0.0000000(0) | 1.0000000(0) | 0.006(0)         | 0.01611                |
| <b>Mn(1)</b>  | 1.0000000(0)                                                                                                    | 0.0000000(0) | 0.7850790(0) | 0.038(0)         | 0.02927                |
| <b>Mn(2)</b>  | 1.0000000(0)                                                                                                    | 0.0000000(0) | 1.0000000(0) | 0.034(0)         | 0.01611                |
| <b>B</b>      | 0.6667000(0)                                                                                                    | 0.3333000(0) | 0.7436000(0) | 1.000(0)         | 0.02000                |
| <b>O</b>      | 0.5204000(0)                                                                                                    | 0.4796000(0) | 0.7449300(0) | 1.000(0)         | 0.01633                |
